# Supplementary material
Source: publisher site journal article supplement (https://www.dovepress.com/article/275731)
Supplement: Supplementary file 1 [file get_supplementary_file.php]

# Appendices

## Appendix A - Guiding Principles for Evaluation

Through evaluation excellence, healthcare practitioners are guided to do their best work and optimize the delivery of healthcare services. As part of Alberta Health Services, Evaluation Services is a professional practice that offers specialized expertise and experience in the field of health care-related evaluation. As an external model of evaluation, our team has rights, responsibilities and duties to ensure reliable and useable results. Our practice is guided by the following principles: integrity, collaboration and ethical oversight.

**Integrity**

An external model of evaluation can help to enhance objectively by offering an outside perspective. Not having a vesting interest in the initiative helps to reduce the risk of conflict of interest. Any possible conflict of interest will be declared. While the interpretation of evaluation results by stakeholders is critical to providing context and a deeper understanding, Evaluation Services will only report on what the data presents and will not entertain requests to exclude or adjust findings unless there is evidence that the request is valid. This helps to safeguard the integrity of the evaluation results.

Our practice is governed by a professional code set by the Canadian Evaluation Society, our own *Survey and Evaluation Services Standards of Practice (2011*) and provincial legislations[[1]](#footnote-1).We will not engage in inappropriate requests that may violate those standards and the integrity and reputation of the evaluator and the evaluation.

**Collaboration**

We recognize that active stakeholder involvement in evaluation planning and decision-making is essential to success. Collaboration helps to ensure that: evaluation results are useful; decision-making is evidence informed; there is good stewardship of resources; and through stakeholder engagement, a culture of evaluation evolves within your organization.

**Ethical Oversight**

Evaluation Services is committed to employing a systematic approach for ethical oversight in all projects. We work to ensure sound methodology and ethical practice at all stages of the evaluation. Ethical oversight is essential to reducing risk to human participants and by protecting the personal and health information collected and stored for evaluation purposes.

## Appendix B - The First Nations Principles of OCAP®

The First Nations principles of OCAP® are a set of standards that establish how First Nations data should be collected, protected, used, or shared. They are the de facto standard for how to conduct research with First Nations.

There are four components of OCAP®: Ownership, Control, Access and Possession.

**Ownership**

Refers to the relationship of First nations to their cultural knowledge, data, and information. This principles states that a community or group owns information collectively in the same way that an individual owns his or her personal information.

**Control**

Affirms that First Nations, their communities, and representative bodies are within their rights in seeking to control over all aspects of research and information management processes that impact them. First Nations control of research can include all stages of a particular research project-from start to finish. The principle extends to the control of resources and review processes, the planning process, management of the information and so on.

**Access**

Refers to the fact that First Nations must have access to information and data about themselves and their communities regardless of where it is held. The principle of access also refers to the right of First Nations communities and organizations to manage and make decisions regarding access to their collective information. This may be achieved, in practice, through standardized, formal protocols.

**Possession**

While ownership identifies the relationship between a people and their information in principle, possession or stewardship is more concrete: it refers to the physical control of data. Possession is the mechanism by which ownership can be asserted and protected.

1. Governing provincial legislations include: Health Information Act (HIA), Freedom of Information and Protection of Privacy (FOIP) and the Alberta Evidence Act (AEA) [↑](#footnote-ref-1)
